# Supplementary material for: The Relationship between Agricultural Teaching Approaches and Food Security in Kenya
Source: Hindawi journal article supplement (doi:10.1155/2020/8847864), 2020-07-11

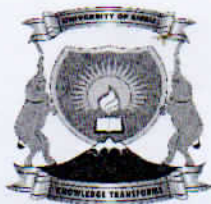

## UNIVERSITY OF EMBU

P.O. Box 6-60100  
Embu – Kenya  
Email: [dbs@embuni.ac.ke](mailto:dbs@embuni.ac.ke)  
Website: [www.embuni.ac.ke](http://www.embuni.ac.ke)

Tel: +254 20 2444136  
+254 727933950

### OFFICE OF THE DEAN (SCHOOL OF EDUCATION & SOCIAL SCIENCES)

REF: UoEm/SoESS/RS/Vol. 1/002

DATE: 13<sup>th</sup> February, 2018

### TO WHOM IT MAY CONCERN

RE: RESEARCH FOR HELLEN NJURA JOSEPH E880/128/2014

The above named person is a bonafide student pursuing Ph.D. in school of Education and Social Sciences in Department of Education Communication, Administration and Planning.

Her proposal titled: *approaches to teaching agriculture for food security in Kenya: A case of secondary schools in Embu county Kenya*. The proposal has been approved by Board of Postgraduate Studies. Consequently, she will be conducting her research in the ministry of Education.

Any assistance accorded will be highly appreciated.

Thank you.

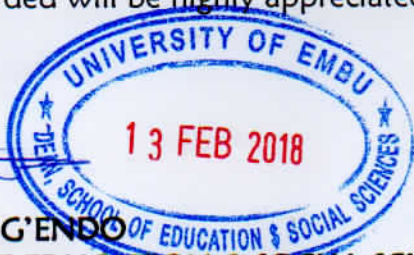

DR. MADRINE KING'ENDO  
DEAN, SCHOOL OF EDUCATION & SOCIAL SCIENCES

MKG/emn

Copy to:

- Student's file

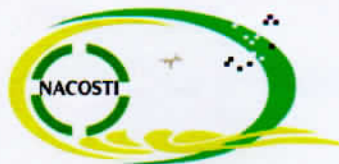

**NATIONAL COMMISSION FOR SCIENCE,  
TECHNOLOGY AND INNOVATION**

Telephone: 020 400 7000,  
0713 788787, 0735404245  
Fax: +254-20-318245, 318249  
Email: dg@nacosti.go.ke  
Website: www.nacosti.go.ke  
When replying please quote

NACOSTI, Upper Kabete  
Off Waiyaki Way  
P.O. Box 30623-00100  
NAIROBI-KENYA

Ref. No. **NACOSTI/P/18/79441/22274**

Date: **25<sup>th</sup> April, 2018**

Hellen Njura Joseph  
University of Embu  
P.O. BOX 6 - 60100  
**EMBU.**

**RE: RESEARCH AUTHORIZATION**

Following your application for authority to carry out research on "*Approaches to teaching agriculture for food security in Kenya*". *A case of secondary schools in Embu County Kenya*" I am pleased to inform you that you have been authorized to undertake research in **Embu County** for the period ending **23<sup>rd</sup> April, 2019**.

You are advised to report to **the County Commissioner and the County Director of Education, Embu County** before embarking on the research project.

Kindly note that, as an applicant who has been licensed under the Science, Technology and Innovation Act, 2013 to conduct research in Kenya, you shall deposit **a copy** of the final research report to the Commission within **one year** of completion. The soft copy of the same should be submitted through the Online Research Information System.

**DR. STEPHEN K. KIBIRU, PhD.**  
**FOR: DIRECTOR-GENERAL/CEO**

Copy to:

The County Commissioner  
Embu County.

The County Director of Education  
Embu County.

**THIS IS TO CERTIFY THAT:**

**MS. HELLEN NJURA JOSEPH**

**of UNIVERSITY OF EMBU, 0-60105**

**KARABA, has been permitted to conduct  
research in Embu County**

**on the topic: APPROACHES TO  
TEACHING AGRICULTURE FOR FOOD  
SECURITY IN KENYA A CASE OF  
SECONDARY SCHOOLS IN EMBU COUNTY  
KENYA**

**for the period ending:**

**23rd April, 2019**

**Permit No : NACOSTI/P/18/79441/22274**

**Date Of Issue : 25th April, 2018**

**Fee Recieved :Ksh 2000**

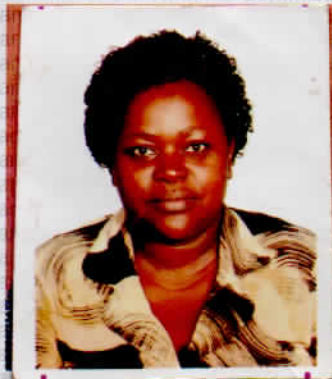

**Applicant's  
Signature**

**Director General  
National Commission for Science,  
Technology & Innovation**

## CONDITIONS

1. The License is valid for the proposed research, research site specified period.
2. Both the Licence and any rights thereunder are non-transferable.
3. Upon request of the Commission, the Licensee shall submit a progress report.
4. The Licensee shall report to the County Director of Education and County Governor in the area of research before commencement of the research.
5. Excavation, filming and collection of specimens are subject to further permissions from relevant Government agencies.
6. This Licence does not give authority to transfer research materials.
7. The Licensee shall submit two (2) hard copies and upload a soft copy of their final report.
8. The Commission reserves the right to modify the conditions of this Licence including its cancellation without prior notice.

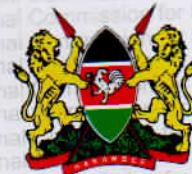

REPUBLIC OF KENYA

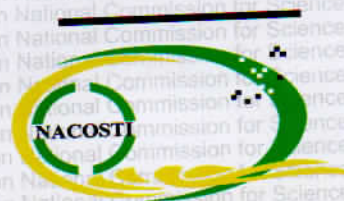

National Commission for Science,  
Technology and Innovation

RESEARCH CLEARANCE  
PERMIT

Serial No.A 18414

CONDITIONS: see back page

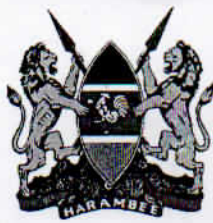

**THE PRESIDENCY**

**MINISTRY OF INTERIOR AND COORDINATION OF NATIONAL GOVERNMENT**

Telephone: Embu 0202310839

FAX 30040

email: [ccembu@gmail.com](mailto:ccembu@gmail.com)

*When replying please quote ref and date*

COUNTY COMMISSIONER

EMBU COUNTY

P.O BOX 3-60100

**EMBU**

**REF: EBU.CC/ADM/3/37/VOL. II/ (182)**

**DATE: 18<sup>th</sup> May, 2018**

**Deputy County Commissioners**

**EMBU COUNTY**

**RE: RESEARCH AUTHORIZATION**

Please be informed that **Hellen Njura Joseph, Research Permit No. NACOSTI/P/18/79441/22274 of University of Embu Registration No. E880/128/2014** has been authorized to carry out research in your Sub-County for a period ending **23<sup>rd</sup> April, 2019**.

Her research is based on **"Approaches to teaching agriculture for food security in Kenya." A case of Secondary Schools in Embu County, Kenya"**

Kindly accord her the necessary assistance.

**C. A. IMAJA**

**FOR: COUNTY COMMISSIONER**

**EMBU COUNTY**

Copy to:

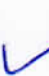 **Hellen Njura Joseph**

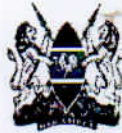

## MINISTRY OF EDUCATION

### STATE DEPARTMENT OF EARLY LEARNING AND BASIC EDUCATION

Telegrams: "Provedu". Embu  
Telephone: Embu 31711  
Fax: 30956  
E-mail: cde.embu@yahoo.com  
When replying please quote:

OFFICE OF THE  
COUNTY DIRECTOR OF EDUCATION  
EMBU COUNTY  
P. O. BOX 123-60100  
EMBU

Ref. No: EBC/GA/32/VOL.III/108

14<sup>th</sup> May, 2018

Hellen Njura Joseph  
University of Embu  
P. O. Box 6-60100  
EMBU

#### RE: RESEARCH AUTHORIZATION

Reference is made to NACOSTI/P/18/79441/22274 dated 25<sup>th</sup> April, 2018.

This office acknowledges receipt of your research authorization to carry out research on  
**"Approaches to teaching agriculture for food security in Kenya." A case in  
secondary schools in Embu County Kenya,"** for a period ending 23<sup>rd</sup> April, 2019.

This office has no objection and therefore wishes you success in this undertaking and  
requests prospective participants/respondents to accord you cooperation or support you  
may require.

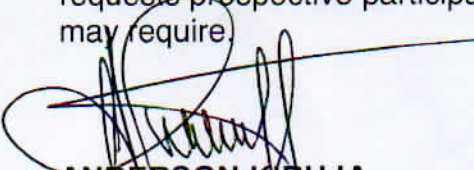  
ANDERSON KIRUJA  
For: COUNTY DIRECTOR OF EDUCATION  
EMBU COUNTY

Copy to: The Director Quality Assurance & Standards – MOEST, NAIROBI  
The Secretary/CEO, NACOSTI – NAIROBI  
The County Coordinator of Health, EMBU COUNTY  
The Sub-County Directors of Education, EMBU COUNTY

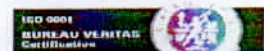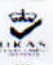

Supplement: f1 [file 8847864.f1.zip › 8847864.f1/HELLEN NJURA RESEARCH AUTHORIZATION20200521_16224500.pdf]
