# Supplementary material for: The Relationship between Agricultural Teaching Approaches and Food Security in Kenya
Source: Hindawi journal article supplement (doi:10.1155/2020/8847864), 2020-07-11
Supplement: f1 [file 8847864.f1.zip]

Archive with 2 entries (2 files):
- 8847864.f1/Data set to Hindawi.sav
- 8847864.f1/HELLEN NJURA RESEARCH AUTHORIZATION20200521_16224500.pdf
